# Supplementary material for: Lost in the plot: missing visual elements in Kaplan-Meier plots of phase III oncology trials
Source: PubMed Central journal article supplement (PMC11224967; doi:10.1093/oncolo/oyae067), 2024-06-01
Supplement: oyae067_suppl_supplementary_material.pdf [file oyae067_suppl_supplementary_material.pdf]

## Supplementary Online Content

### Lost in the Plot: Missing Visual Elements in Kaplan-Meier Plots of Phase III

#### Oncology Trials

**Figure S1.** Example structural causal model depicted on a directed acyclic graph.

**Table S1.** Characteristics of trials and frequency of Kaplan-Meier missing visual element.

**Table S2.** Unadjusted regressions of trial-level characteristics and missing visual elements.

**Table S3.** Adjusted regressions of trial-level characteristics and missing visual elements.

**Table S4.** Adjusted regressions of enrollment using different cutoffs and missing visual elements.

**Figure S1.** An example structural causal model depicted on a directed acyclic graph illustrating the putative relationships between trial-level characteristics and missing visual elements (MVE). In this example, publication year is the factor of interest (shown in green). The outcome (MVE) is shown in blue. Confounders specific to the relationship between publication year and MVE are treatment type and enrollment size (shown in yellow). These confounders were included in the multivariable model evaluating the effect of publication year on MVE.

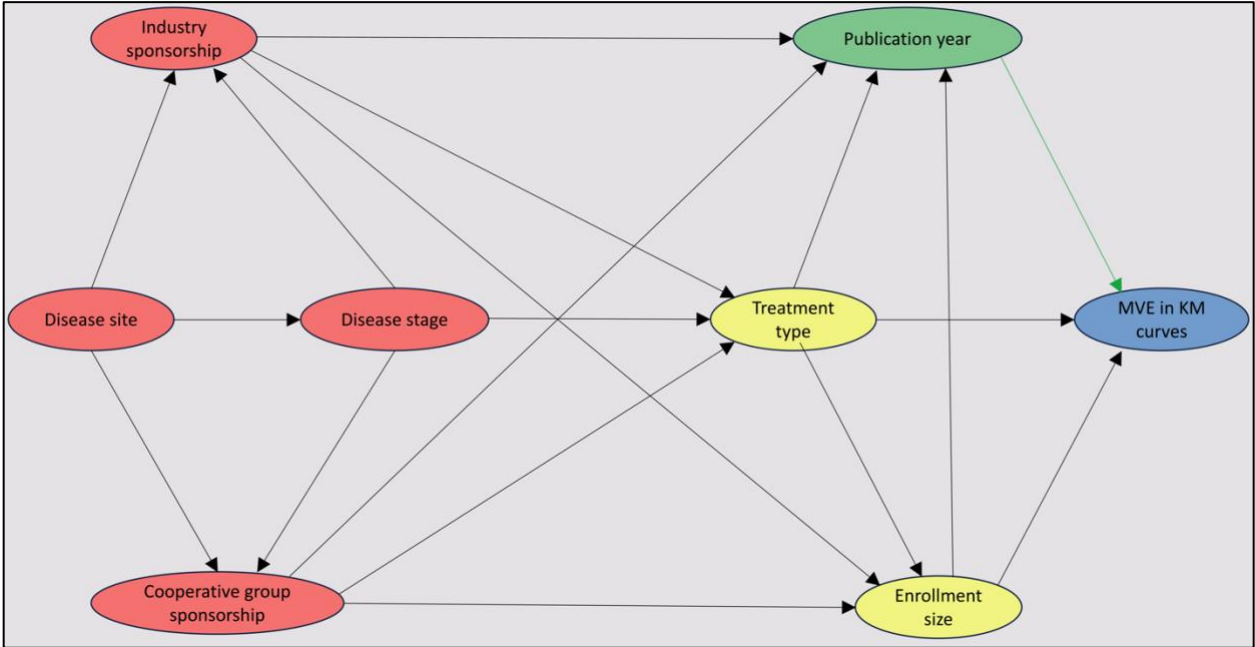

**Table S1.** Characteristics of phase III oncology randomized controlled trials and Kaplan-Meier plots with missing visual elements (MVE).

| <b>Characteristic</b>         | <b>All trials, N</b> | <b>Kaplan-Meier MVE, N (%)</b> |
|-------------------------------|----------------------|--------------------------------|
| <b>Total trials</b>           | 641                  | 116 (18%)                      |
| <b>Disease Stage</b>          |                      |                                |
| Solid M0                      | 138                  | 32 (23%)                       |
| Solid M1                      | 374                  | 47 (13%)                       |
| Hematologic                   | 129                  | 37 (29%)                       |
| <b>Disease Site</b>           |                      |                                |
| Breast                        | 112                  | 14 (13%)                       |
| Gastrointestinal              | 91                   | 14 (15%)                       |
| Genitourinary                 | 79                   | 12 (15%)                       |
| Hematologic                   | 129                  | 37 (29%)                       |
| Thoracic                      | 107                  | 15 (14%)                       |
| Other <sup>a</sup>            | 123                  | 24 (20%)                       |
| <b>Treatment Type</b>         |                      |                                |
| Supportive Care               | 40                   | 24 (60%)                       |
| Local Therapy                 | 23                   | 6 (26%)                        |
| Systemic Therapy              | 578                  | 86 (15%)                       |
| <b>Cooperative Study</b>      | 182                  | 57 (31%)                       |
| <b>Industry Funded</b>        | 513                  | 65 (13%)                       |
| <b>Enrollment<sup>b</sup></b> |                      |                                |
| <323                          | 160                  | 52 (33%)                       |
| <563                          | 159                  | 20 (13%)                       |
| <889                          | 162                  | 23 (14%)                       |
| ≥889                          | 160                  | 21 (13%)                       |

Abbreviations: M0 = non-metastatic; M1 = metastatic.

<sup>a</sup> Includes central nervous system, skin, endocrine, gynecologic, sarcoma, pediatric, head and neck, and trials evaluating multiple disease sites.

<sup>b</sup> Enrolled number of patients is categorized by quartiles.

**Table S2.** Unadjusted associations of phase III oncology randomized controlled trial characteristics and Kaplan-Meier plots with missing visual elements (MVE).

| <b>Characteristic</b>         | <b>OR</b> | <b>95% CI</b> | <b>P</b> |
|-------------------------------|-----------|---------------|----------|
| <b>Disease Stage</b>          |           |               |          |
| Solid M0                      | 0.75      | 0.43 to 1.30  | 0.31     |
| Solid M1                      | 0.36      | 0.22 to 0.58  | <0.0001  |
| Hematologic                   | Ref       |               |          |
| <b>Disease Site</b>           |           |               |          |
| Breast                        | 0.59      | 0.28 to 1.19  | 0.15     |
| Gastrointestinal              | 0.75      | 0.36 to 1.53  | 0.44     |
| Genitourinary                 | 0.74      | 0.34 to 1.55  | 0.44     |
| Hematologic                   | 1.66      | 0.93 to 3.01  | 0.09     |
| Thoracic                      | 0.67      | 0.33 to 1.35  | 0.27     |
| Other <sup>a</sup>            | Ref       |               |          |
| <b>Treatment Type</b>         |           |               |          |
| Supportive Care               | 8.58      | 4.42 to 17.11 | <0.0001  |
| Local Therapy                 | 2.02      | 0.71 to 5.01  | 0.15     |
| Systemic Therapy              | Ref       |               |          |
| <b>Cooperative Study</b>      | 3.09      | 2.04 to 4.69  | <0.0001  |
| <b>Industry Funded</b>        | 0.22      | 0.14 to 0.34  | <0.0001  |
| <b>Enrollment<sup>b</sup></b> |           |               |          |
| <323                          | Ref       |               |          |
| <563                          | 0.30      | 0.16 to 0.52  | <0.0001  |
| <889                          | 0.34      | 0.20 to 0.59  | 0.0001   |
| ≥889                          | 0.31      | 0.18 to 0.59  | <0.0001  |
| <b>Publication Year</b>       | 0.81      | 0.76 to 0.86  | <0.0001  |

Abbreviations: M0 = non-metastatic; M1 = metastatic; OR = odds ratio.

<sup>a</sup> Includes central nervous system, skin, endocrine, gynecologic, sarcoma, pediatric, head and neck, and trials evaluating multiple disease sites.

<sup>b</sup> Enrolled number of patients is categorized by quartiles and analyzed as an un-ordered categorical variable.

**Table S3.** Adjusted associations of phase III oncology randomized controlled trial characteristics and Kaplan-Meier plots with missing visual elements (MVE). Only the effect estimates from the factor of interest for each multivariable model are shown here. Confounder variables included in the models informed by directed acyclic graphs and their effect estimates are not displayed.

| <b>Characteristic</b>         | <b>aOR</b> | <b>95% CI</b> | <b>P</b> |
|-------------------------------|------------|---------------|----------|
| <b>Disease Stage</b>          |            |               |          |
| Solid M0                      | 0.97       | 0.50 to 1.86  | 0.92     |
| Solid M1                      | 0.45       | 0.24 to 0.84  | 0.01     |
| Hematologic                   | Ref        |               |          |
| <b>Disease Site</b>           |            |               |          |
| Breast                        | 0.59       | 0.28 to 1.19  | 0.15     |
| Gastrointestinal              | 0.75       | 0.36 to 1.53  | 0.44     |
| Genitourinary                 | 0.74       | 0.34 to 1.55  | 0.44     |
| Hematologic                   | 1.66       | 0.93 to 3.01  | 0.09     |
| Thoracic                      | 0.67       | 0.33 to 1.35  | 0.27     |
| Other <sup>a</sup>            | Ref        |               |          |
| <b>Treatment Type</b>         |            |               |          |
| Supportive Care               | 5.83       | 2.88 to 12.02 | <0.0001  |
| Local Therapy                 | 0.80       | 0.27 to 2.11  | 0.66     |
| Systemic Therapy              | Ref        |               |          |
| <b>Cooperative Study</b>      | 1.39       | 0.76 to 2.49  | 0.27     |
| <b>Industry Funded</b>        | 0.29       | 0.15 to 0.53  | <0.0001  |
| <b>Enrollment<sup>b</sup></b> |            |               |          |
| <323                          | Ref        |               |          |
| <563                          | 0.38       | 0.20 to 0.69  | 0.002    |
| <889                          | 0.45       | 0.25 to 0.80  | 0.007    |
| ≥889                          | 0.36       | 0.20 to 0.66  | 0.0009   |
| <b>Publication Year</b>       | 0.79       | 0.74 to 0.85  | <0.0001  |

Abbreviations: M0 = non-metastatic; M1 = metastatic; aOR = adjusted odds ratio.

<sup>a</sup> Includes central nervous system, skin, endocrine, gynecologic, sarcoma, pediatric, head and neck, and trials evaluating multiple disease sites.

<sup>b</sup> Enrolled number of patients is categorized by quartiles and analyzed as an un-ordered categorical variable.

**Table S4.** Adjusted associations of phase III oncology randomized controlled trial characteristics and Kaplan-Meier plots with missing visual elements (MVE) evaluating different approaches to analyzing the enrollment variable.

| <b>Characteristic</b> | <b>aOR</b> | <b>95% CI</b> | <b>P</b> |
|-----------------------|------------|---------------|----------|
| <b>Enrollment</b>     |            |               |          |
| <100                  | Ref        |               |          |
| ≥100                  | 0.30       | 0.11 to 0.86  | 0.02     |
| <b>Enrollment</b>     |            |               |          |
| <200                  | Ref        |               |          |
| ≥200                  | 0.23       | 0.13 to 0.41  | <0.0001  |
